# Supplementary material for: A link between the fibroblast growth factor axis and the miR‐16 family reveals potential new treatment combinations in mesothelioma
Source: PubMed Central journal article supplement (PMC5748487; doi:10.1002/1878-0261.12150), 2017-11-18
Supplement: MOL2-12-58-s001.pdf [file MOL2-12-58-s001.pdf]

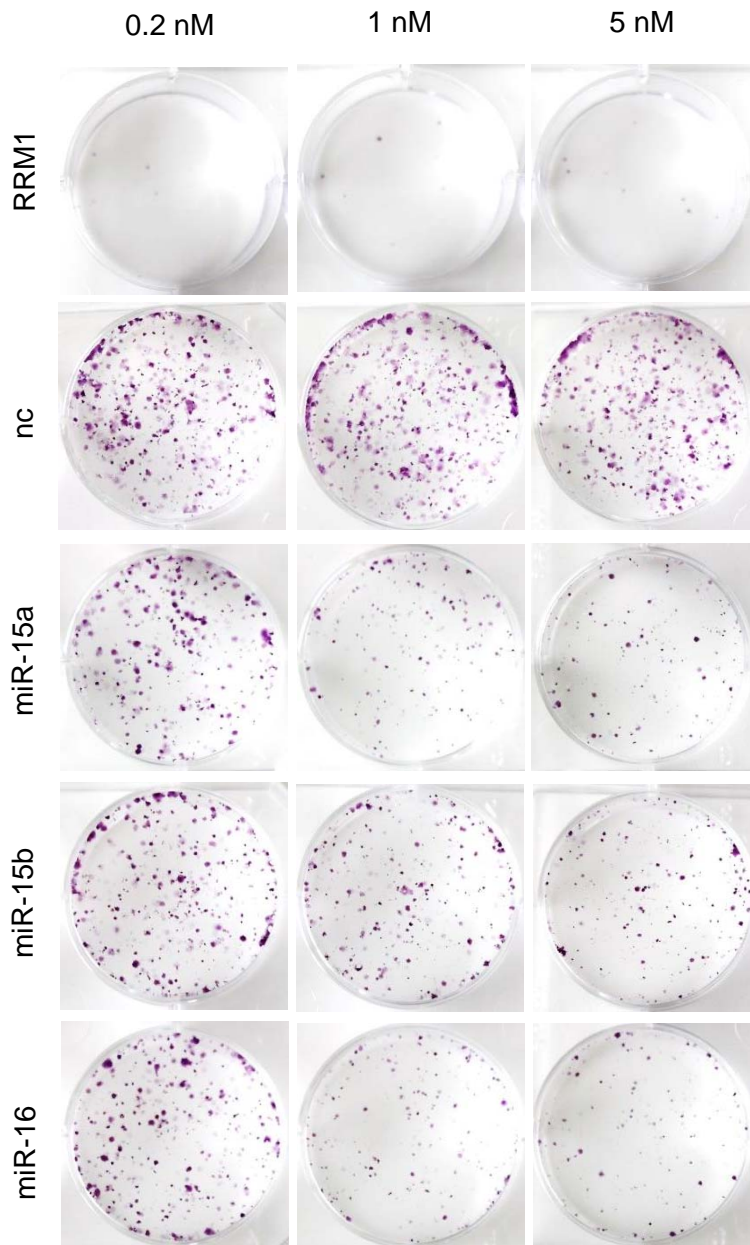

**Fig. S1:** Representative pictures of MSTO cells in a colony formation after transfection with microRNA mimics or non coding control (nc) with the indicated concentrations. RRM1 siRNA was used as transfection control.

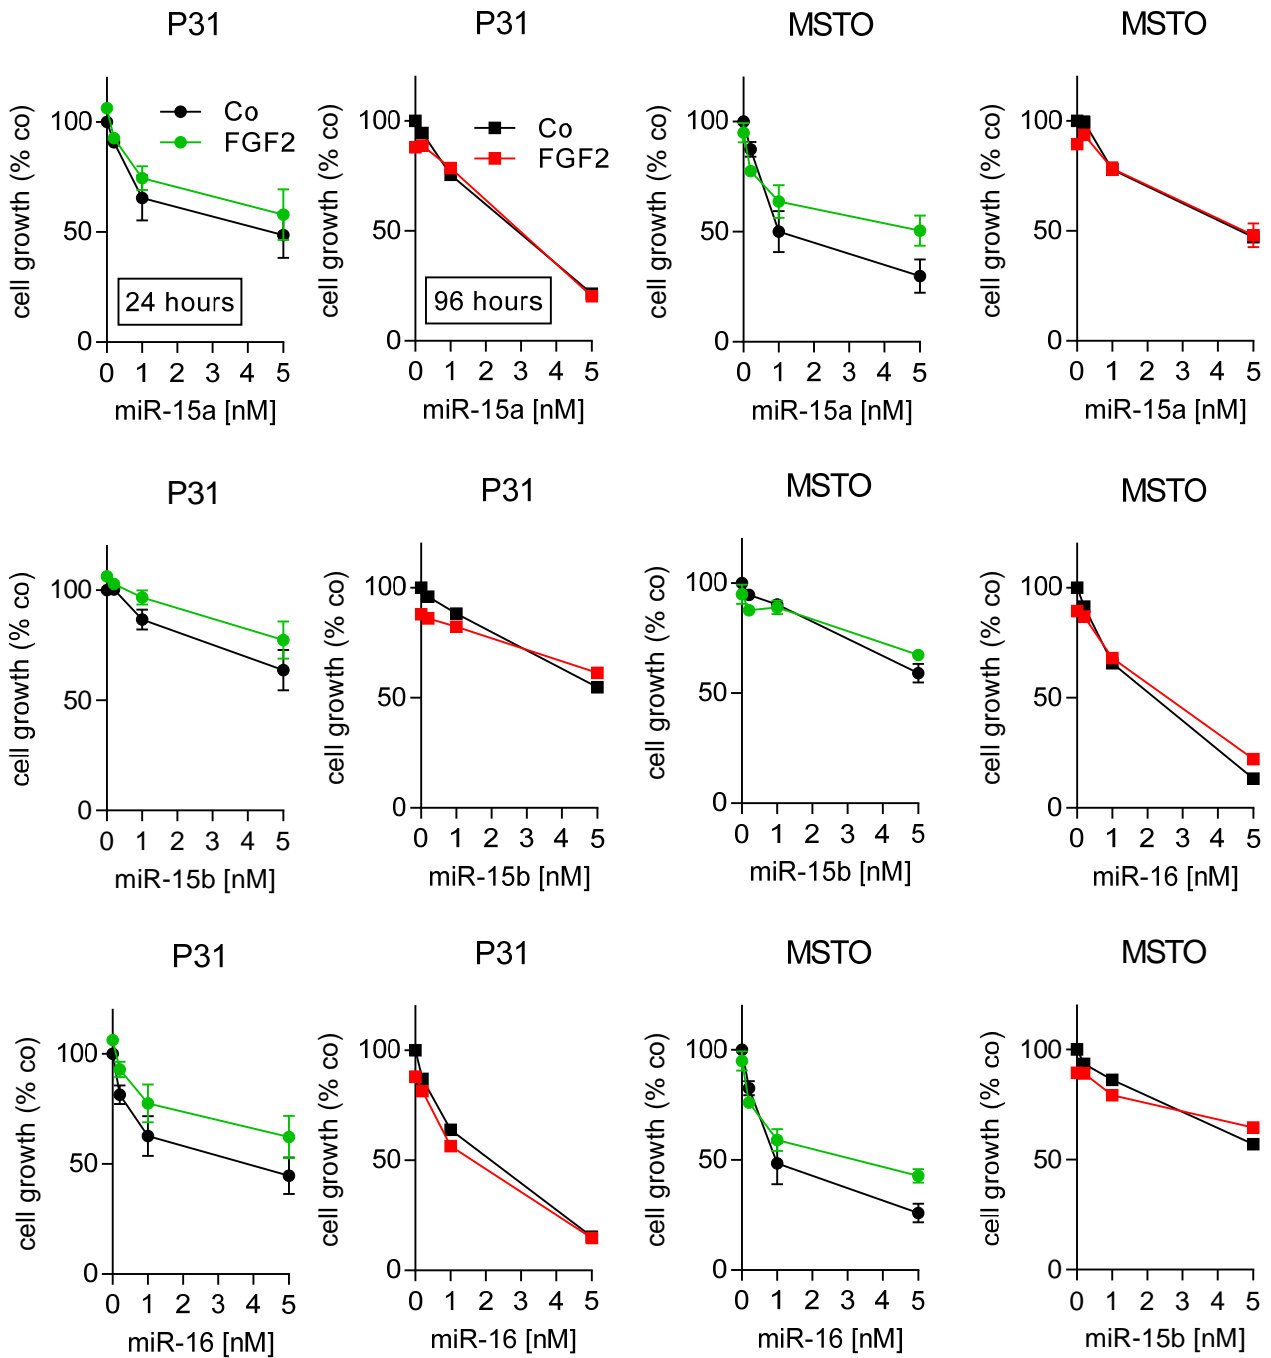

**Fig. S2:** Growth inhibition assays of P31 and MSTO cells after transfection with mimics in combination with FGF2 treatment (10 ng/ml) 24 h after mimic transfection (green). In case of FGF2 treatment 96 h after transfection (red), each well was split 1:3 on the day before treatment to avoid complete confluence. Assays were stopped 72 h after FGF2 treatment.

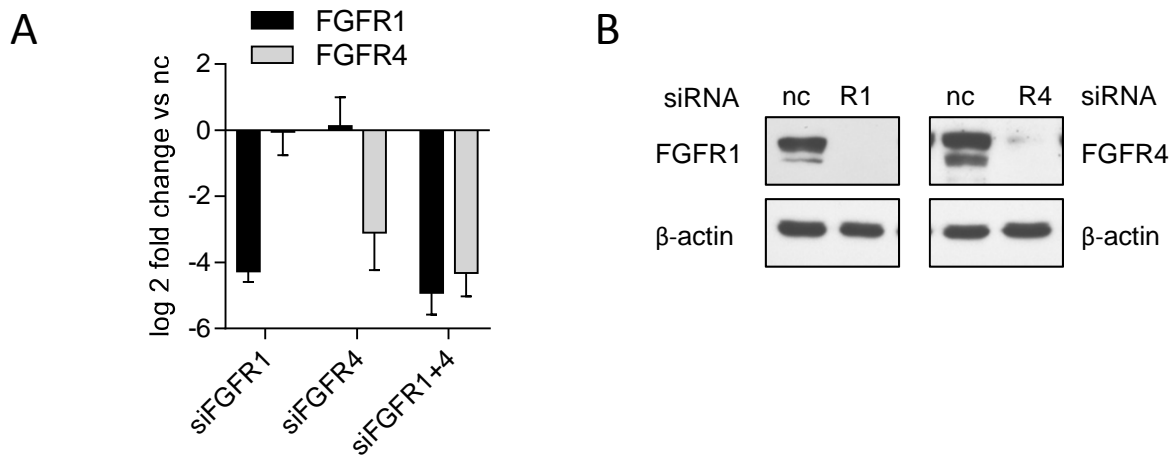

**Fig. S3: (A)** Target gene expression analysis via qPCR 24 h after transfection with FGFR1, FGFR4 or both siRNAs (10 nM) compared to non coding control (nc) in SPC212, P31 and MSTO cells. **(B)** Western blot analysis of FGFR1 (R1) and FGFR4 (R4) knock down in SPC212 cells 72 h after transfection with respective siRNAs.

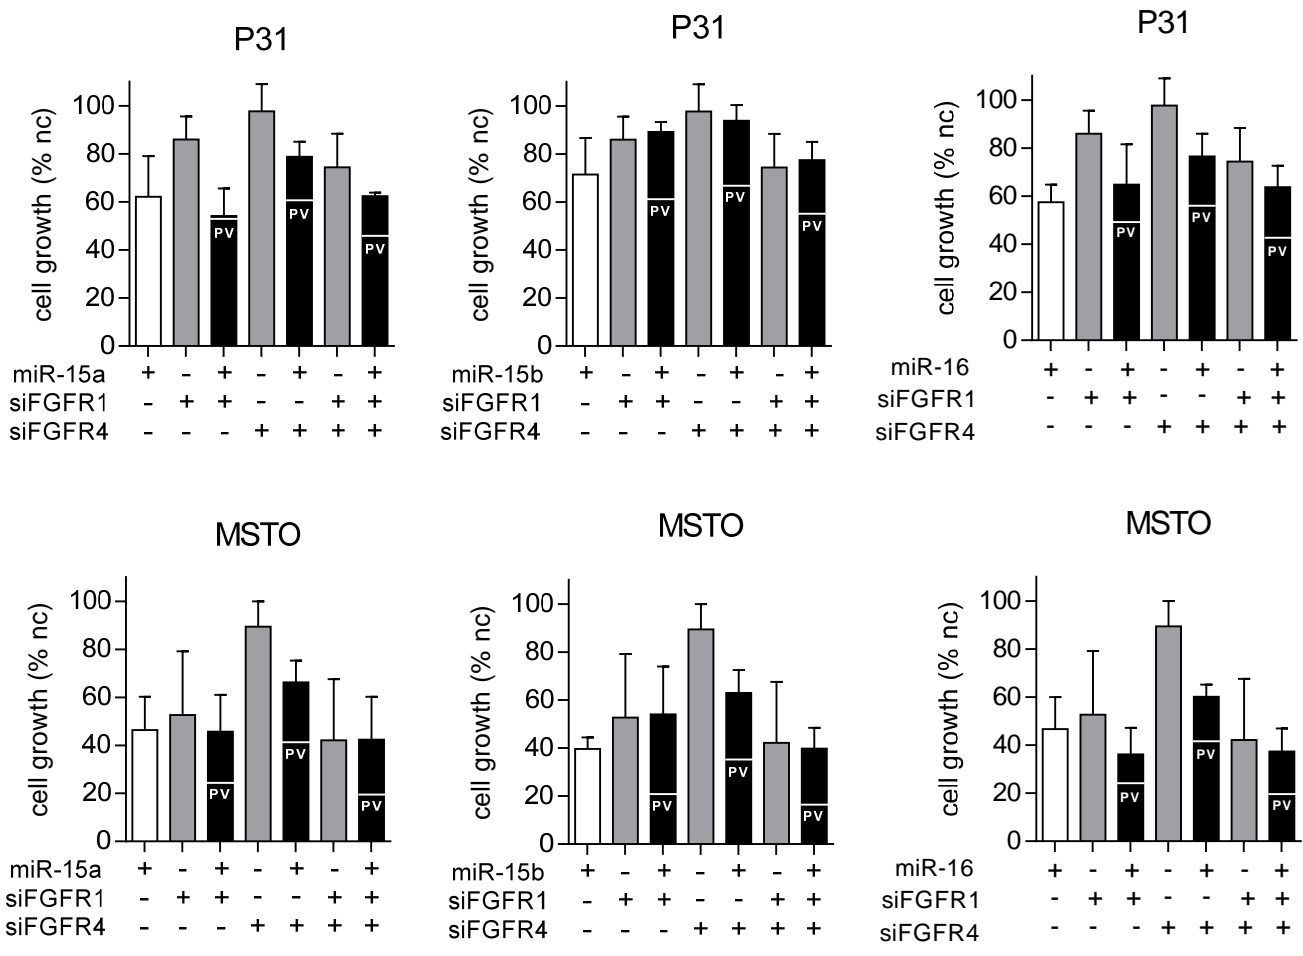

**Fig.S4:** Growth inhibition assays of P31 and MSTO cells 72 h after transfection with microRNA mimics (5 nM) and/or siRNAs (10 nM) or respective controls (nc). Predicted values of additive interaction (PV) are indicated as white lines within the black combination bars.

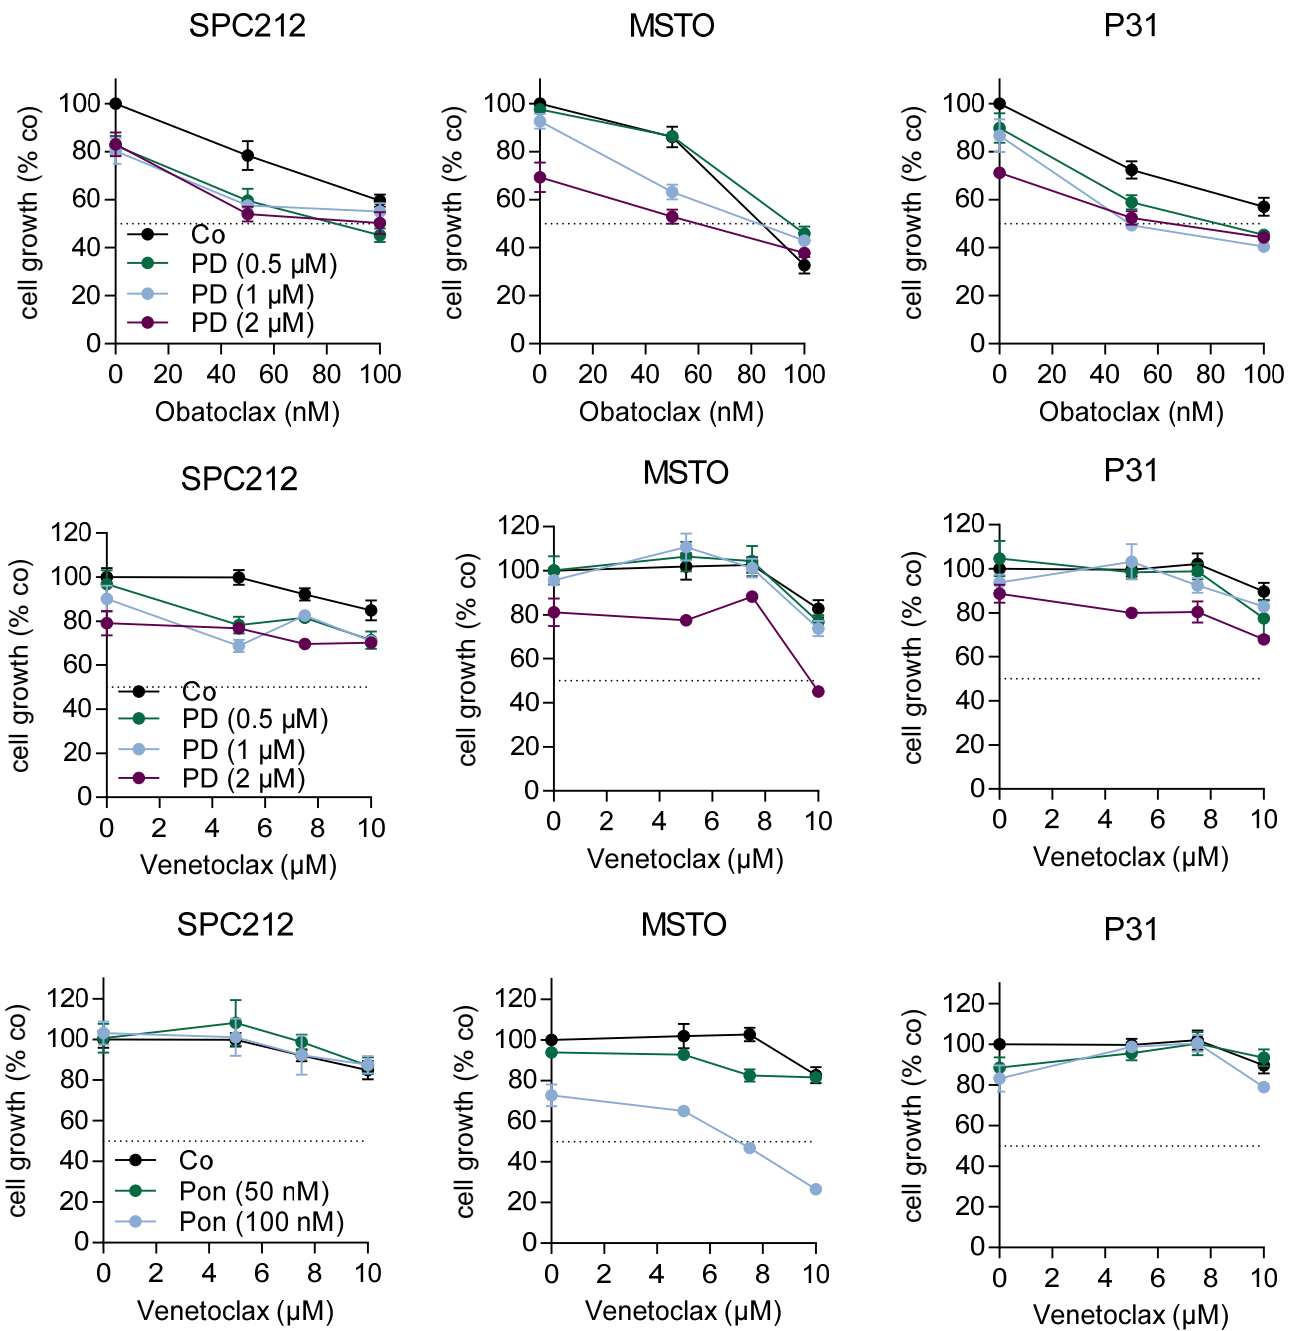

**Fig.S4:** Growth inhibition assays of SPC212, MSTO and P31 cells 72 hours after treatment with PD166866 (PD) or ponatinib (Pon) in combination with obatoclox or venetoclox, or respective controls (co), at the indicated doses.
